# Supplementary material for: PBSIM2: a simulator for long-read sequencers with a novel generative model of quality scores
Source: PubMed Central journal article supplement — Bioinformatics. 2020 Sep 25;37(5):589–95. doi: 10.1093/bioinformatics/btaa835 (PMC8097687; doi:10.1093/bioinformatics/btaa835), 2020-09-25
Supplement: btaa835_supplementary_data.pdf [file btaa835_supplementary_data.pdf]

# Supplementary Information of “PBSIM2: a simulator for long read sequencers with a novel generative model of quality scores”

Yukiteru Ono, Kiyoshi Asai, and Michiaki Hamada\*

## A Supplementary Tables

Table S1: Simulators for long reads

| Simulator                      | Long read        | Error model                                                                    |
|--------------------------------|------------------|--------------------------------------------------------------------------------|
| PBSIM [1]                      | PacBio           | nucleotide sequence-independent error model                                    |
| DAZZ_DB/simulator <sup>a</sup> | PacBio           | nucleotide sequence-independent error model                                    |
| ReadSim [2]                    | PacBio, Nanopore | nucleotide sequence-independent error model                                    |
| SimLoRD [3]                    | PacBio           | nucleotide sequence-independent error model                                    |
| SiLiCO [4]                     | PacBio, Nanopore | nucleotide sequence-independent error model                                    |
| LongISLND [5]                  | PacBio, Nanopore | entended-kmer based error model                                                |
| NanoSim [6]                    | Nanopore         | alignment-based trained model, which does not use k-mer error bias             |
| SNaReSim [7]                   | Nanopore         | k-mer based error model                                                        |
| NPBSS [8]                      | PacBio           | nucleotide sequence-independent error model                                    |
| DeepSimulator [9]              | Nanopore         | pore model generates raw signal, and basecaller converts raw signal into fastq |
| DeepSimulator1.5 [10]          | Nanopore         | pore model generates raw signal, and basecaller converts raw signal into fastq |
| Naopore SimulatION [11]        | Nanopore         | pore model generates raw signal, and basecaller converts raw signal into fastq |
| PaSS [12]                      | PacBio           | k-mer based error model                                                        |
| Badread [13]                   | PacBio, Nanopore | k-mer based error model                                                        |

<sup>a</sup> [https://github.com/thegenemyers/DAZZ\\_DB/blob/master/simulator.c](https://github.com/thegenemyers/DAZZ_DB/blob/master/simulator.c)

\*To whom correspondence should be addressed. Department of Electrical Engineering and Bioscience Faculty of Science and Engineering, Waseda University 55N-06-10, 3-4-1, Okubo Shinjuku-ku, Tokyo 169-8555, Japan. Tel: +81 3 5286 3130; Fax: +81 3 5286 3130; Email: mhamada@waseda.jp

Table S2: Datasets for PacBio sequencers

| Reference                | Chemistry | ReadLength |       | Read accuracy |    | URL                                                                                                                                                                                                                                                               |
|--------------------------|-----------|------------|-------|---------------|----|-------------------------------------------------------------------------------------------------------------------------------------------------------------------------------------------------------------------------------------------------------------------|
|                          |           | mean       | SD    | mean          | SD |                                                                                                                                                                                                                                                                   |
| <i>E.coli</i> K12 MG1655 | P4-C2     | 5,254      | 3,677 | 81%           | 5% | <a href="https://github.com/PacificBiosciences/DevNet/wiki/E.-coli-20kb-Size-Selected-Library-with-P4-C2">https://github.com/PacificBiosciences/DevNet/wiki/E.-coli-20kb-Size-Selected-Library-with-P4-C2</a>                                                     |
| <i>S.cerevisiae</i>      | P4-C2     | 5,856      | 4,422 | 82%           | 5% | <a href="https://github.com/PacificBiosciences/DevNet/wiki/Saccharomyces-cerevisiae-W303-Assembly-Contigs">https://github.com/PacificBiosciences/DevNet/wiki/Saccharomyces-cerevisiae-W303-Assembly-Contigs</a>                                                   |
| <i>N.creassa</i>         | P4-C3     | 5,581      | 3,838 | 81%           | 4% | <a href="https://github.com/PacificBiosciences/DevNet/wiki/Neurospora-Crassa-%28Fungus%29-Genome%2C-Epigenome%2C-and-Transcriptome">https://github.com/PacificBiosciences/DevNet/wiki/Neurospora-Crassa-%28Fungus%29-Genome%2C-Epigenome%2C-and-Transcriptome</a> |
| <i>H.sapiens</i>         | P5-C3     | 6,383      | 5,562 | 83%           | 3% | <a href="https://github.com/PacificBiosciences/DevNet/wiki/H.sapiens_54x_release">https://github.com/PacificBiosciences/DevNet/wiki/H.sapiens_54x_release</a> <sup>a</sup>                                                                                        |
| <i>D.melanogaster</i>    | P5-C3     | 10,095     | 7,224 | 84%           | 2% | <a href="https://github.com/PacificBiosciences/DevNet/wiki/Drosophila-sequence-and-assembly">https://github.com/PacificBiosciences/DevNet/wiki/Drosophila-sequence-and-assembly</a> <sup>b</sup>                                                                  |
| <i>E.coli</i> K12 MG1655 | P6-C4     | 8,582      | 6,953 | 85%           | 4% | <a href="https://github.com/PacificBiosciences/DevNet/wiki/E.-coli-Bacterial-Assembly">https://github.com/PacificBiosciences/DevNet/wiki/E.-coli-Bacterial-Assembly</a>                                                                                           |
| <i>C.elegans</i>         | P6-C4     | 11,560     | 7,667 | 85%           | 3% | <a href="https://github.com/PacificBiosciences/DevNet/wiki/C.-elegans-data-set">https://github.com/PacificBiosciences/DevNet/wiki/C.-elegans-data-set</a> <sup>c</sup>                                                                                            |

SD: standard deviation. Read accuracy was computed from quality scores.

<sup>a</sup> Only m130929\_024849 and m130929\_161837 were used.

<sup>b</sup> Only Dro1\_24NOV2013\_398 was used.

<sup>c</sup> Only m140928\_184123, m140928\_230547, m140928\_033247 and m140928\_075857 were used.

Table S3: Datasets for Oxford Nanopore sequencers

| Reference                | Chemistry | Base-caller    | Read length |        | Read accuracy |     | URL                                                                                                                          |
|--------------------------|-----------|----------------|-------------|--------|---------------|-----|------------------------------------------------------------------------------------------------------------------------------|
|                          |           |                | mean        | SD     | mean          | SD  |                                                                                                                              |
| <i>H.sapiens</i>         | R9.4      | Guppy 3.6.0    | 16,975      | 38,159 | 80%           | 15% | <a href="https://github.com/nanopore-wgs-consortium/CHM13">https://github.com/nanopore-wgs-consortium/CHM13</a> <sup>a</sup> |
| <i>C.elegans</i>         | R9.4      | poretools      | 3,962       | 5,250  | 83%           | 6%  | <a href="https://www.ncbi.nlm.nih.gov/sra/SRX2764157">https://www.ncbi.nlm.nih.gov/sra/SRX2764157</a>                        |
| <i>E.coli</i> O127:H6    | R9.4      | Guppy 3.1.5    | 9,231       | 14,187 | 90%           | 3%  | <a href="https://www.ncbi.nlm.nih.gov/sra/SRX8094377">https://www.ncbi.nlm.nih.gov/sra/SRX8094377</a>                        |
| <i>S.cerevisiae</i>      | R9.4      | poretools      | 12,473      | 14,182 | 86%           | 10% | <a href="https://www.ncbi.nlm.nih.gov/sra/SRX2849976">https://www.ncbi.nlm.nih.gov/sra/SRX2849976</a>                        |
| <i>D.melanogaster</i>    | R9.5      | Albacore 2.1.0 | 6,699       | 6,703  | 92%           | 6%  | <a href="https://www.ncbi.nlm.nih.gov/sra/SRX3676783">https://www.ncbi.nlm.nih.gov/sra/SRX3676783</a> ,<br>Run=SRR6821890    |
| <i>P.koreensis</i>       | R9.5      | Albacore 2.1.3 | 25,740      | 15,090 | 84%           | 8%  | <a href="https://www.ncbi.nlm.nih.gov/sra/SRX3923115">https://www.ncbi.nlm.nih.gov/sra/SRX3923115</a>                        |
| <i>R.sphaeroides</i>     | R9.5      | Guppy 3.0.3    | 5,650       | 7,247  | 83%           | 8%  | <a href="https://www.ncbi.nlm.nih.gov/sra/SRX7341766">https://www.ncbi.nlm.nih.gov/sra/SRX7341766</a>                        |
| <i>C.armoricus</i>       | R9.5      | Albacore 2.3.4 | 9,966       | 9,004  | 90%           | 3%  | <a href="https://www.ncbi.nlm.nih.gov/sra/SRX6887881">https://www.ncbi.nlm.nih.gov/sra/SRX6887881</a>                        |
| <i>E.coli</i> K12 MG1655 | R10.3     | Guppy 3.4.5    | 6,397       | 4,708  | 85%           | 3%  | <a href="https://www.ncbi.nlm.nih.gov/sra/ERX3900444">https://www.ncbi.nlm.nih.gov/sra/ERX3900444</a>                        |

SD: standard deviation. Read accuracy was computed from quality scores.

<sup>a</sup> 100,000 reads with a length of 100 bp or more were sampled from the rel5 dataset.

Table S4: Top30 6-mer with high rate of insertion

| <i>C.elegans</i> P6-C4<br>6-mer | rate | <i>R.sphaeroides</i> R9.5<br>6-mer | rate  | <i>E-coli</i> K12 R10.3<br>6-mer | rate |
|---------------------------------|------|------------------------------------|-------|----------------------------------|------|
| GTATAG                          | 7.1% | TAGAGT                             | 10.4% | CCTAGA                           | 8.9% |
| GCACGC                          | 7.0% | TATTAA                             | 9.7%  | CTAGAT                           | 7.8% |
| GTATAC                          | 6.9% | TTAGCT                             | 9.1%  | CCAGGA                           | 7.8% |
| CACGCG                          | 6.9% | TAATTA                             | 9.1%  | CTAGTC                           | 7.7% |
| TACCGA                          | 6.7% | CACTAA                             | 9.0%  | GCCTGG                           | 7.6% |
| TACGTC                          | 6.7% | TAAGGA                             | 8.9%  | CCAGGC                           | 7.5% |
| CGGTGT                          | 6.7% | TGTACG                             | 8.8%  | TCCTGG                           | 7.4% |
| TCACGC                          | 6.6% | ACTAAG                             | 8.6%  | CCAGGT                           | 7.3% |
| GGTGTA                          | 6.6% | GGTACA                             | 8.1%  | CCTGGT                           | 7.3% |
| TACGCG                          | 6.5% | ACACTA                             | 7.8%  | CGATCG                           | 7.2% |
| ACACCG                          | 6.5% | TAACAT                             | 7.7%  | ACCAGG                           | 7.2% |
| GGCGTA                          | 6.5% | AATAAC                             | 7.6%  | GAGATC                           | 7.2% |
| GTACGT                          | 6.5% | GAGTCA                             | 7.5%  | GATCTA                           | 7.2% |
| GCGCGA                          | 6.5% | CTGTAC                             | 7.5%  | TCTAGT                           | 7.2% |
| GTATAA                          | 6.5% | GTACAC                             | 7.4%  | ACCTGG                           | 7.0% |
| TGTAGC                          | 6.4% | GTACAT                             | 7.3%  | ATCTAG                           | 6.8% |
| ACCGCG                          | 6.4% | CCTAGT                             | 7.2%  | CGATCT                           | 6.8% |
| TAACGC                          | 6.4% | CTAACA                             | 7.1%  | AGATCG                           | 6.8% |
| CGCGCA                          | 6.4% | ATACAG                             | 6.9%  | CCCAGG                           | 6.7% |
| ACGTCC                          | 6.4% | AGTACA                             | 6.9%  | TGATCG                           | 6.6% |
| GCGGTA                          | 6.4% | CGAGTC                             | 6.9%  | GATCTC                           | 6.6% |
| GTACCC                          | 6.4% | ACTTTA                             | 6.8%  | AGATCA                           | 6.6% |
| ACCGCA                          | 6.4% | TCTAGT                             | 6.8%  | GATCAT                           | 6.5% |
| TGCGGT                          | 6.4% | ACCTTA                             | 6.7%  | GATCGG                           | 6.5% |
| CGCGCG                          | 6.3% | CATGTA                             | 6.7%  | GATCGC                           | 6.5% |
| GTGTAG                          | 6.3% | CTAGTG                             | 6.7%  | TGATCA                           | 6.5% |
| GTCGTA                          | 6.3% | TAAGAG                             | 6.7%  | GTCTAA                           | 6.4% |
| ACGCGT                          | 6.2% | GTCATA                             | 6.6%  | GATCAG                           | 6.4% |
| TTATAC                          | 6.2% | ATCTAA                             | 6.6%  | GATCGA                           | 6.4% |
| GTGCAG                          | 6.2% | TATACA                             | 6.6%  | ACGATC                           | 6.4% |

Error rates were calculated for 6 bp long sequence on the reference sequence in the alignment of real reads, while shifting the 6 bp long sequence by 1 bp from end to end. Next, the averaged error rate of each 6-mer was calculated.

Table S5: Top 30 6-mer with high rate of deletion

| <i>C.elegans</i> P6-C4<br>6-mer | rate | <i>R.sphaeroides</i> R9.5<br>6-mer | rate  | <i>E-coli</i> K12 R10.3<br>6-mer | rate  |
|---------------------------------|------|------------------------------------|-------|----------------------------------|-------|
| GGGCC                           | 9.6% | GGGGG                              | 22.9% | GGGGG                            | 27.7% |
| GGGGC                           | 8.9% | CCCCC                              | 22.7% | CCCCC                            | 27.3% |
| GCCCC                           | 8.6% | TTTTT                              | 18.9% | TCCCC                            | 20.7% |
| AGGGG                           | 8.6% | AGGGG                              | 18.3% | GGGGG                            | 20.0% |
| CCCGG                           | 8.4% | CCCCT                              | 18.3% | CCCCT                            | 19.7% |
| CCCCG                           | 8.3% | TCCCC                              | 17.5% | AGGGG                            | 19.1% |
| GGGGT                           | 8.2% | AAAAA                              | 17.3% | CCCCA                            | 18.9% |
| CCCCA                           | 8.2% | CTTTT                              | 17.2% | CCCCG                            | 18.2% |
| CCCCT                           | 8.0% | GGGGG                              | 16.7% | TGGGG                            | 18.1% |
| TGGGG                           | 8.0% | AAAAA                              | 14.9% | CGGGG                            | 17.7% |
| CCGGG                           | 8.0% | AAGGG                              | 14.7% | GGGGC                            | 17.6% |
| GGGGC                           | 8.0% | CCCCT                              | 14.7% | ACCCC                            | 17.3% |
| ACCCC                           | 8.0% | CCTTT                              | 14.5% | GCCCC                            | 17.2% |
| CCCCC                           | 7.9% | GGGGT                              | 14.4% | GGGGT                            | 17.2% |
| GCCGG                           | 7.9% | CGGGG                              | 14.4% | TTCCC                            | 14.6% |
| AGGGC                           | 7.8% | TTAAG                              | 14.3% | GGGGG                            | 14.6% |
| CCCCG                           | 7.8% | CTCCC                              | 14.2% | CCCCG                            | 14.5% |
| GGCCC                           | 7.8% | CCCCG                              | 14.2% | CAGGG                            | 14.0% |
| GGGTT                           | 7.8% | ACCCC                              | 14.1% | CCCCT                            | 14.0% |
| GGGGG                           | 7.7% | TAAAA                              | 13.9% | CCGGG                            | 13.8% |
| GGGGC                           | 7.7% | AGGGG                              | 13.9% | CCCCG                            | 13.7% |
| GAGGG                           | 7.7% | CTCTC                              | 13.8% | TCGGG                            | 13.6% |
| GGCCT                           | 7.6% | TAAGG                              | 13.8% | CGGGG                            | 13.5% |
| CCGGC                           | 7.5% | CTAAG                              | 13.7% | AAAAA                            | 13.5% |
| GGCCA                           | 7.5% | CCCCT                              | 13.7% | TGCCC                            | 13.4% |
| TCCCC                           | 7.4% | CAAAA                              | 13.7% | GGGGG                            | 13.4% |
| GCCCG                           | 7.4% | GCCCC                              | 13.6% | GGGGT                            | 13.4% |
| AGGGC                           | 7.4% | AAAAG                              | 13.6% | TCCCC                            | 13.2% |
| GGGGG                           | 7.3% | TCCCCT                             | 13.5% | GGGGC                            | 13.2% |
| GGCCT                           | 7.3% | TAAAAG                             | 13.5% | CCCCG                            | 13.2% |

Error rates were calculated the same as in Table S4.

Table S6: Top 30 6-mer with high rate of substitution

| <i>C.elegans</i> P6-C4 |      | <i>R.sphaeroides</i> R9.5 |       | <i>E.coli</i> K12 R10.3 |       |
|------------------------|------|---------------------------|-------|-------------------------|-------|
| 6-mer                  | rate | 6-mer                     | rate  | 6-mer                   | rate  |
| GTCTGG                 | 2.7% | CGAATC                    | 10.8% | GATCTA                  | 14.2% |
| GGGGGG                 | 2.3% | GATTCG                    | 10.4% | TAGATC                  | 14.1% |
| AGTCTG                 | 2.1% | ACTAGG                    | 9.0%  | CTACTA                  | 12.8% |
| ATTGGG                 | 2.1% | GTCTAG                    | 8.5%  | CAGATC                  | 12.8% |
| ACGGCC                 | 2.0% | TGTCTA                    | 8.1%  | TCGATC                  | 12.5% |
| CGGGGG                 | 2.0% | TACTAG                    | 7.7%  | GATCGA                  | 12.3% |
| GGGGGT                 | 1.9% | GACTAG                    | 7.6%  | CTAGAC                  | 12.3% |
| ACCCCC                 | 1.9% | CTAGGC                    | 7.5%  | TCTAGT                  | 12.2% |
| CCCCCC                 | 1.9% | GCCTAG                    | 7.4%  | TCTAGG                  | 12.2% |
| TTGGGA                 | 1.8% | CTAGAT                    | 7.3%  | GATCAA                  | 12.2% |
| CCCCCT                 | 1.7% | GAATCG                    | 7.3%  | CTAGTA                  | 12.2% |
| GTGGGG                 | 1.7% | CTAGTA                    | 7.3%  | CCGATC                  | 12.2% |
| TGGGGG                 | 1.7% | CGATTC                    | 6.9%  | CTAGTG                  | 12.1% |
| CCCCCA                 | 1.7% | GAATCC                    | 6.9%  | CGATCA                  | 12.0% |
| CACCCC                 | 1.6% | GGATTC                    | 6.8%  | GATCTG                  | 11.9% |
| GGTACC                 | 1.6% | AAGTTA                    | 6.7%  | TAGTAT                  | 11.9% |
| AGGGGT                 | 1.6% | AACTAG                    | 6.7%  | TACTAG                  | 11.9% |
| CAGGGG                 | 1.6% | GAATCT                    | 6.7%  | CGATCG                  | 11.8% |
| GGGGTG                 | 1.6% | GCTAGC                    | 6.7%  | GTCTAG                  | 11.6% |
| GGGGTT                 | 1.5% | TCTAGG                    | 6.6%  | GATCGG                  | 11.6% |
| AGGGAC                 | 1.5% | CTAAGT                    | 6.5%  | TGATCA                  | 11.6% |
| CCCCTA                 | 1.5% | AGATTC                    | 6.5%  | TGATCG                  | 11.5% |
| CTAGGG                 | 1.5% | CTAGCC                    | 6.5%  | TTGATC                  | 11.5% |
| TGGGAA                 | 1.5% | GTCTAC                    | 6.4%  | TAGTAG                  | 11.3% |
| GGCCAG                 | 1.5% | ACTGTA                    | 6.3%  | ACTAGA                  | 11.2% |
| CCCCTG                 | 1.5% | CTAATG                    | 6.3%  | TATCTA                  | 11.2% |
| CGGCCA                 | 1.5% | CTGTAG                    | 6.3%  | AGATCA                  | 11.1% |
| GGGGTA                 | 1.5% | GTCTAA                    | 6.3%  | ACTAGT                  | 11.1% |
| ACCCCT                 | 1.5% | CCTAGG                    | 6.2%  | CGATCT                  | 11.0% |
| CCGGTC                 | 1.4% | CAGACT                    | 6.2%  | AGATCG                  | 11.0% |

Error rates were calculated the same as in Table S4.

## B Supplementary Figures

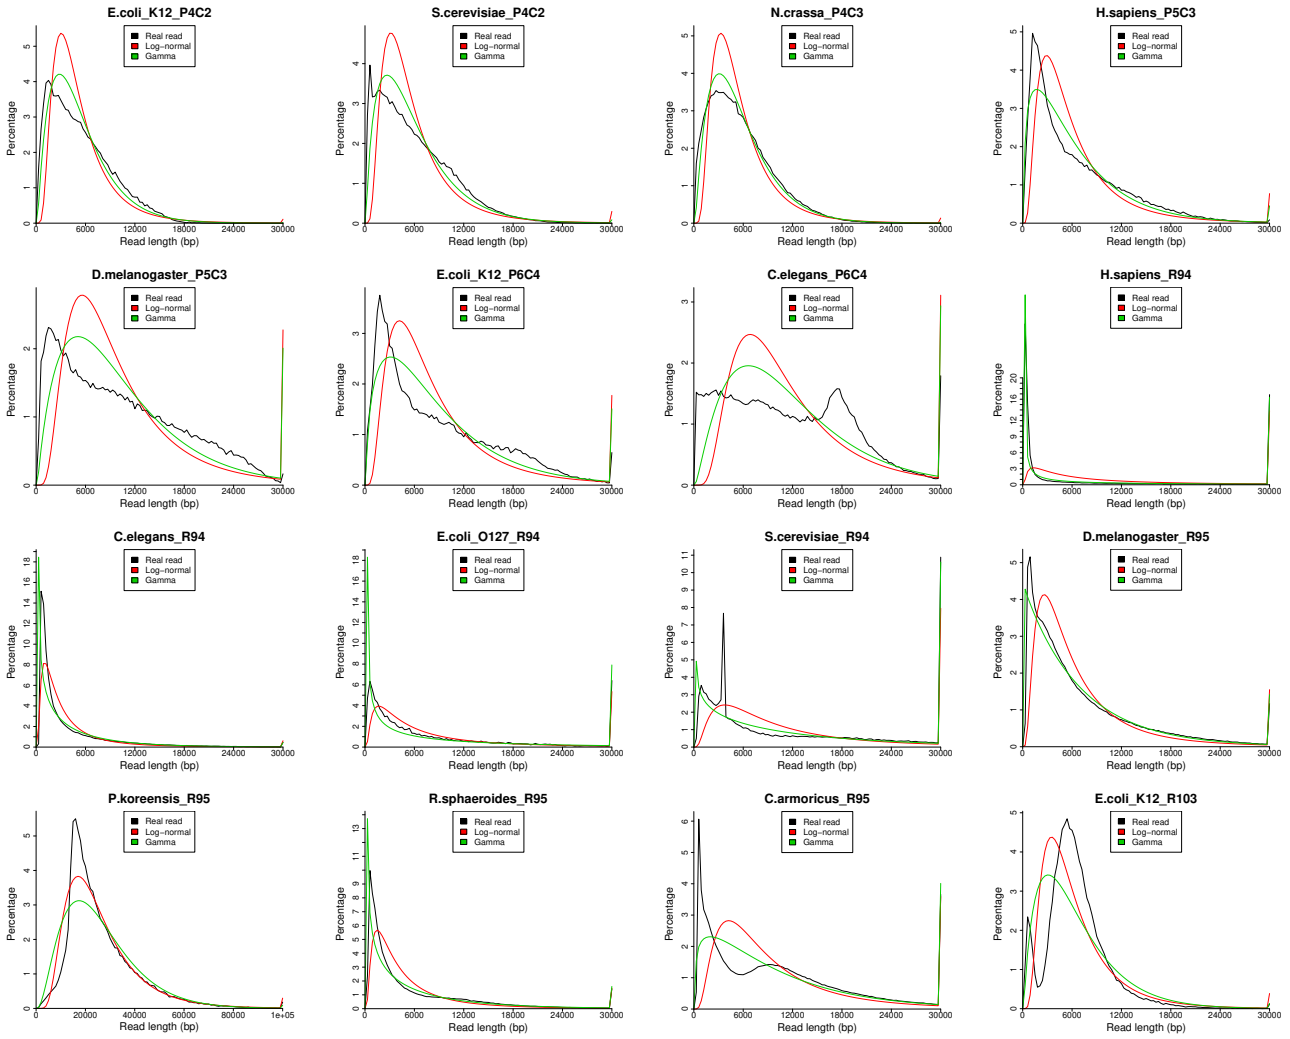

Figure S1: Read length distribution for each of the datasets in Tables S2 and S3. Dataset name is species (e.g., *E. coli\_K12*) + chemistry (e.g., P4C2). Each graph shows distribution of real read length, as well as log-normal and gamma distributions with parameters derived from real reads.

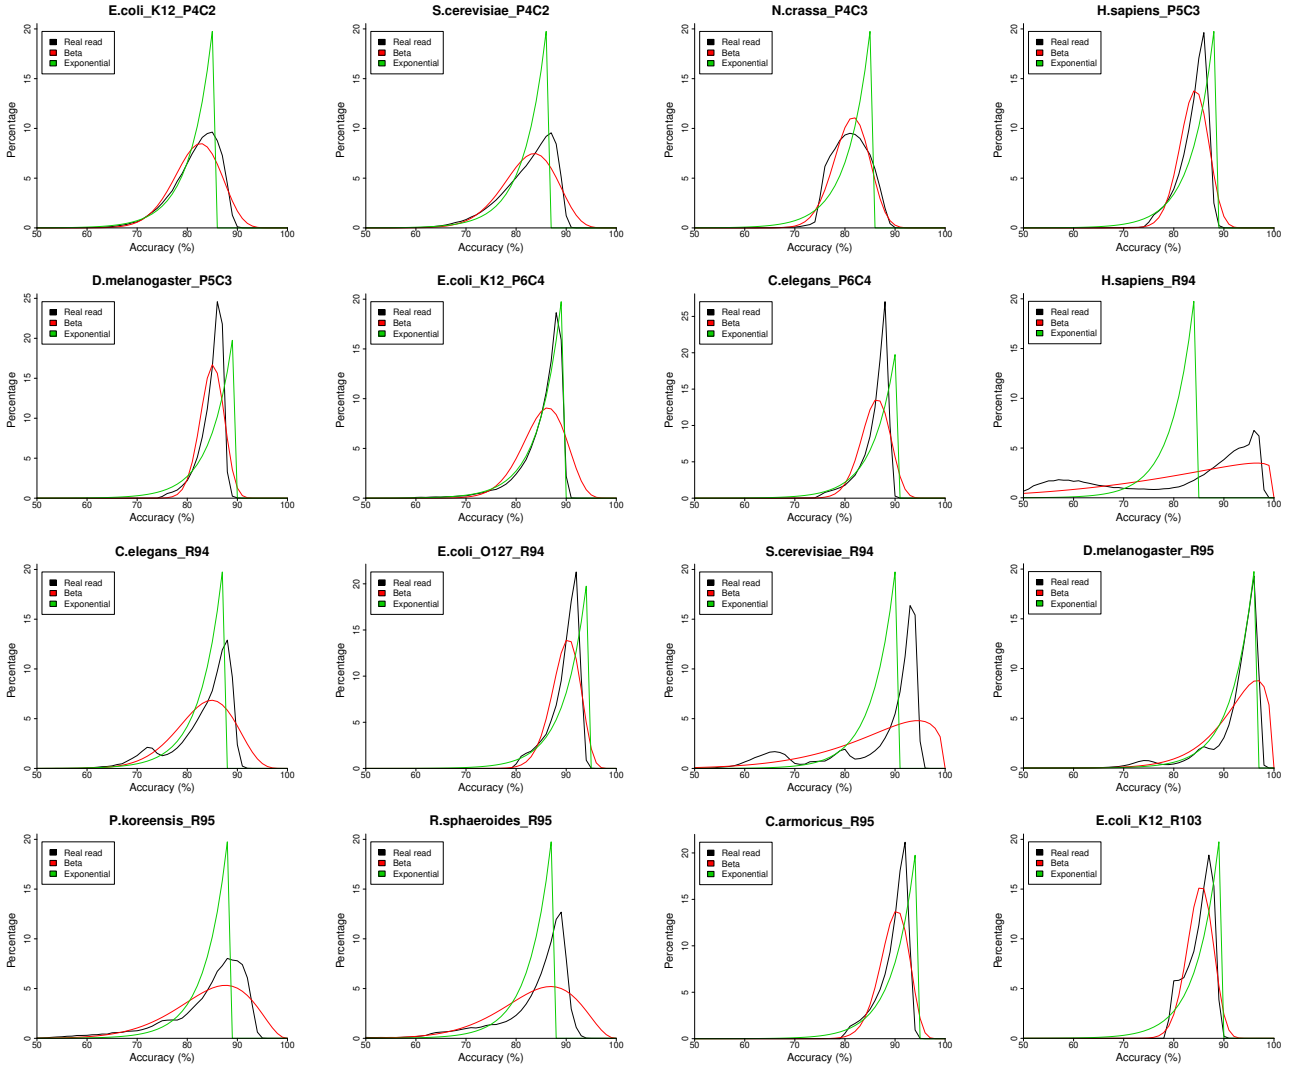

Figure S2: Read accuracy distribution for each of the datasets in Tables S2 and S3. Dataset name is species (e.g., *E. coli\_K12*) + chemistry (e.g., P4C2). Each graph shows distribution of real read length, as well as beta and exponential distributions with parameters derived from real reads. Read accuracy was computed from quality scores.

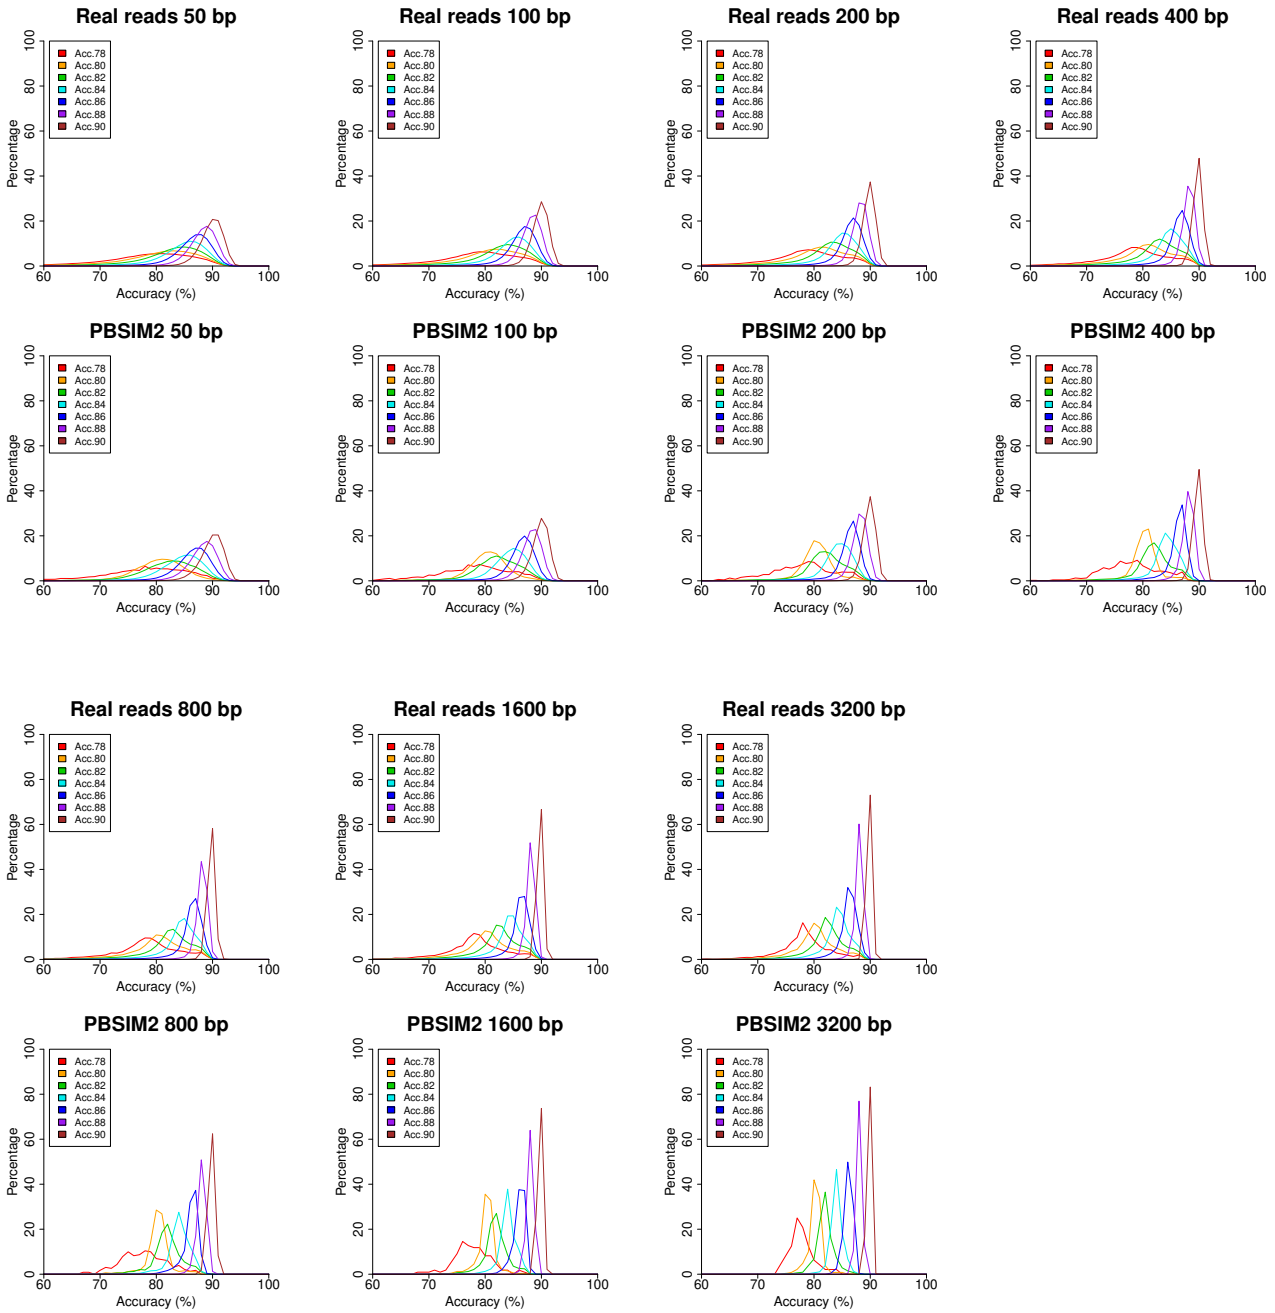

Figure S3: Non-uniformity of quality scores for real and simulated reads of PacBio P6-C4 for *C. elegans*. After grouping reads by their accuracy, the reads were segmented into fixed size (50, 100, 200, 400, 800, 1600, and 3200 bp) disjoint intervals, and the accuracy of each interval was computed from the quality scores. Each graph shows the distribution of averaged accuracy of each interval, where the colors of the plotted lines represent read groups (e.g., “Acc.78” is a read group whose accuracy is 77.5%-78.4%). Read groups (e.g., Acc.78) with insufficient data are not shown in the graphs.



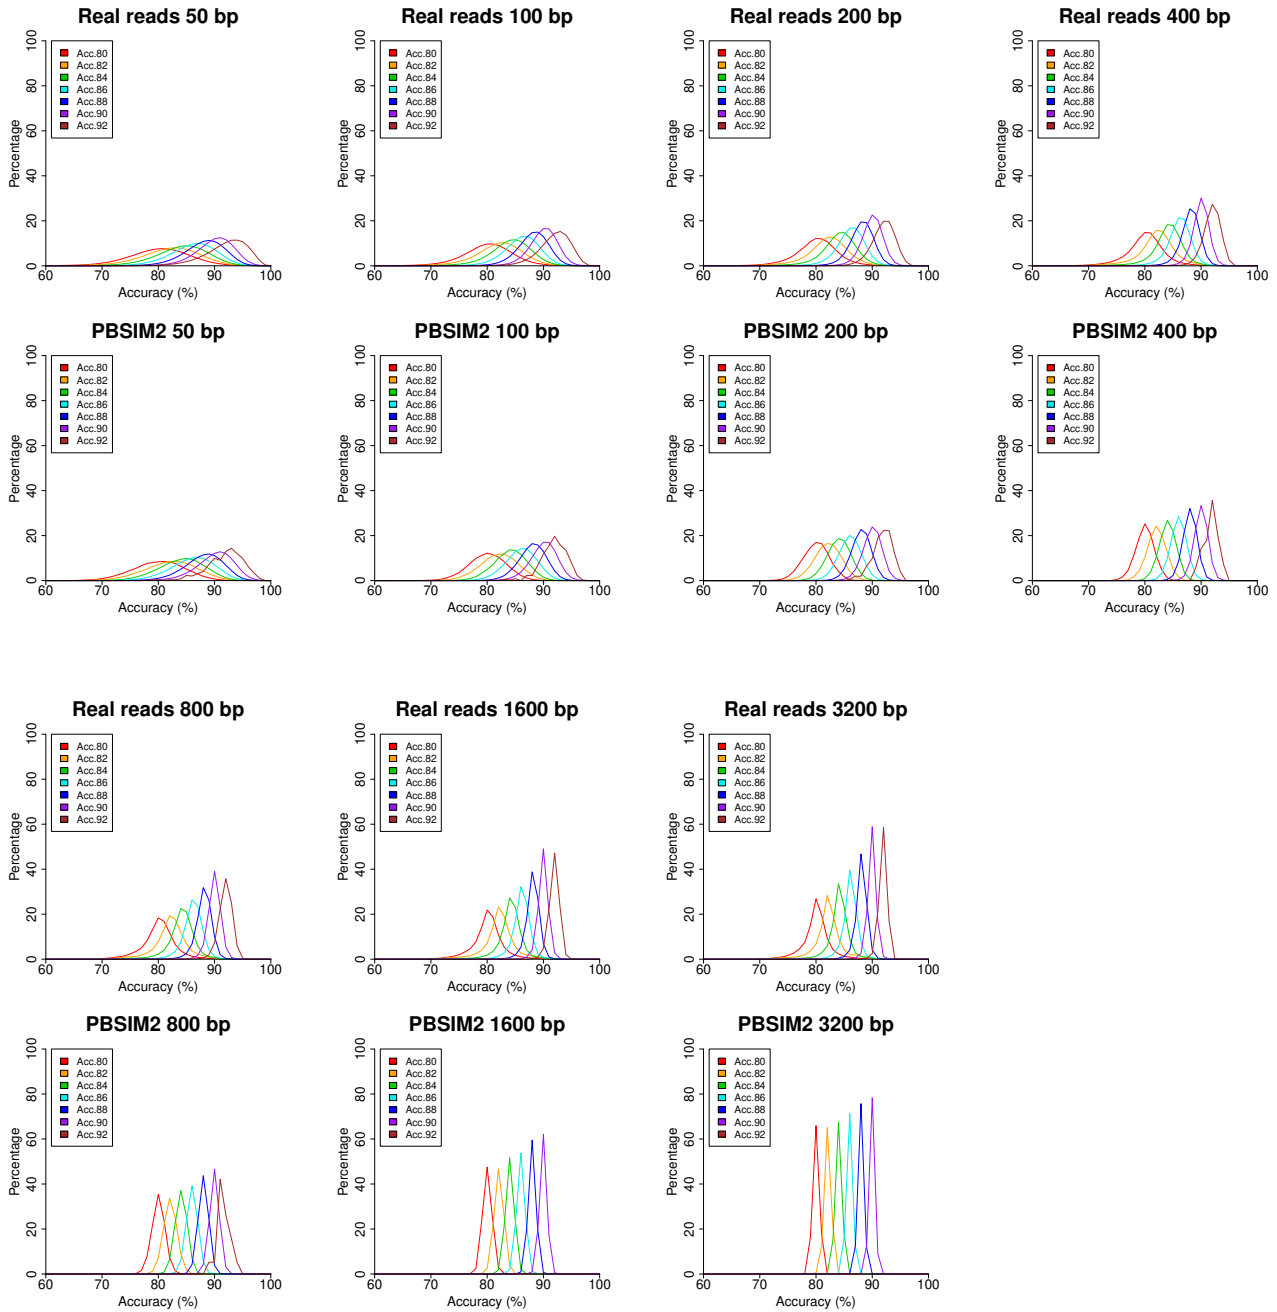

Figure S4: Non-uniformity of quality scores for real and simulated reads of Nanopore R9.5 for *R. sphaeroides*. Each graph shows the distribution of averaged accuracy of each interval in the same way as Figure S3.

(a) PacBio P6-C4 for *C.elegans*

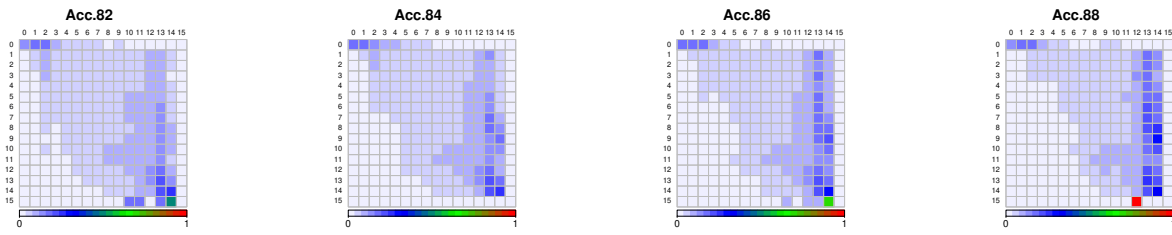

(b) Nanopore R9.5 for *R.sphaeroides*

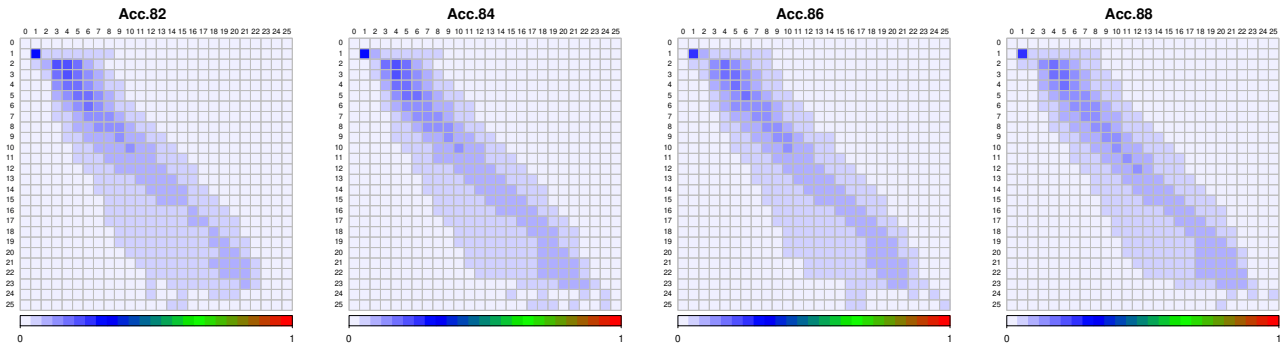

Figure S5: Transition probability matrices of quality scores of real reads. The vertical and horizontal axes are PHRED33 quality scores defined in terms of the estimated error probability (e.g., quality scores 4, 7, and 10 represent error probabilities of 40%, 20%, and 10%, respectively) [14]. Quality scores on the vertical axis transition to scores on the horizontal axis. The sum of transition probabilities on each quality score of the vertical axis is 100%. These are matrices of 'Acc.82'-'Acc.88' (e.g., 'Acc.84' refers to a read group with an accuracy of 83.5%-84.4%). In the Nanopore matrix, quality scores above 25 are not displayed.

(a) PacBio P6-C4 for *C.elegans*

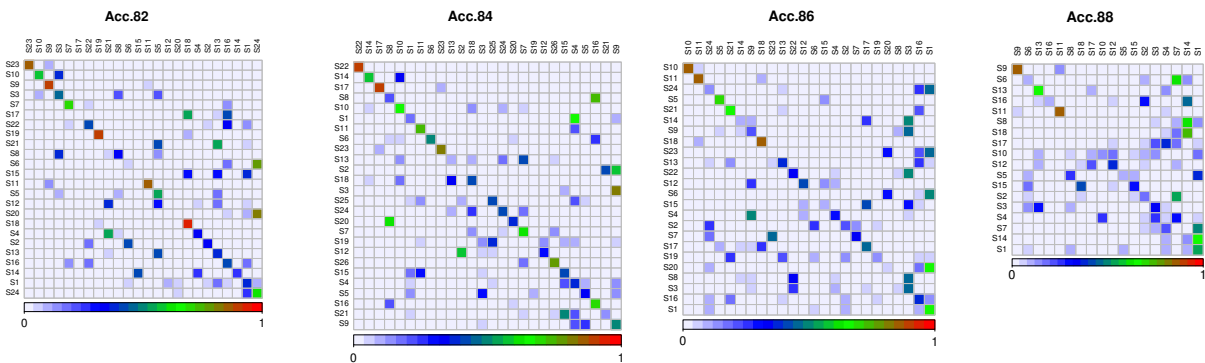

(b) Nanopore R9.5 for *R.sphaeroides*

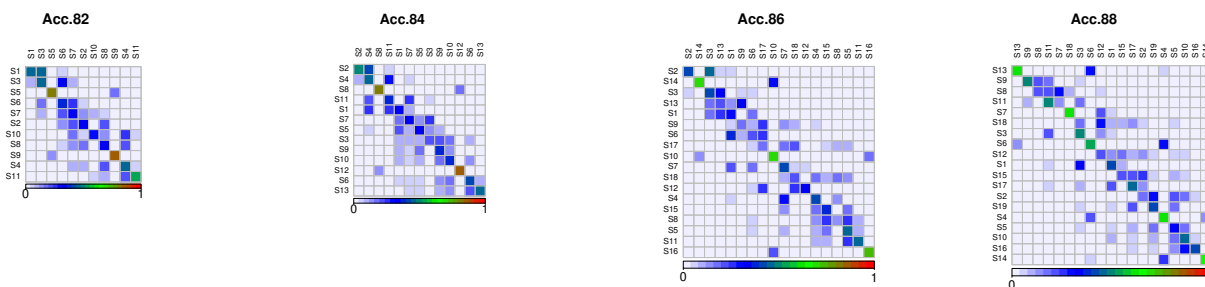

Figure S6: Transition probability matrices of states of FIC-HMM. The vertical and horizontal axes represent states of FIC-HMM, which are sorted in order of the increasing averaged quality score emitted by them. States on the vertical axis transition to states on the horizontal axis. The sum of transition probabilities on each state of the vertical axis is 100%. These are matrices of 'Acc.82'-'Acc.88' (e.g., 'Acc.84' refers to a read group with an accuracy of 83.5%-84.4%).

(a) PacBio P6-C4 for *C.elegans*

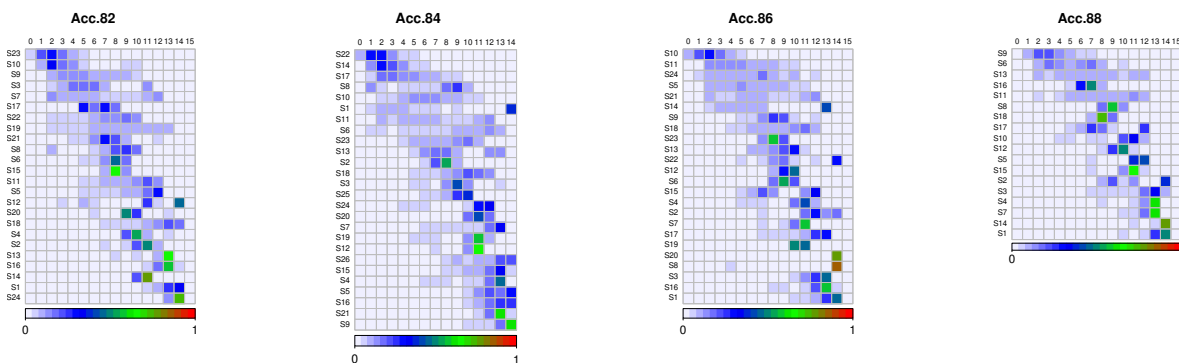

(b) Nanopore R9.5 for *R.sphaeroides*

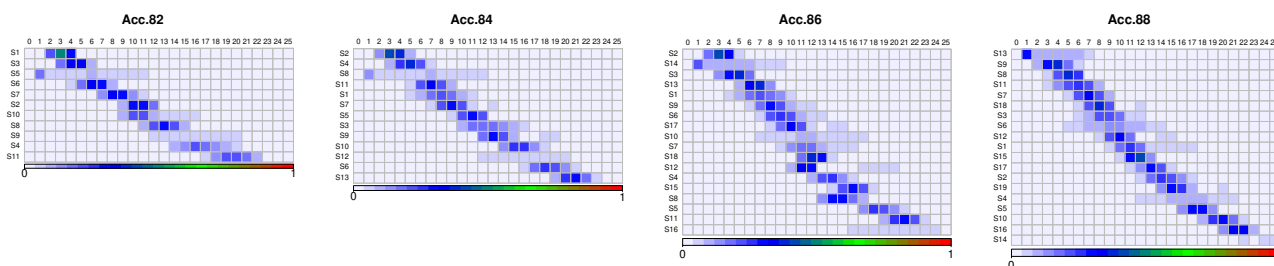

Figure S7: Emission probability matrices of states of FIC-HMM. The vertical axis represents states of FIC-HMM, which are sorted in the order of increasing averaged quality score emitted by them. The horizontal axis is PHRED33 quality score defined in terms of the estimated error probability (e.g., quality scores 4, 7, and 10 represent error probabilities of 40%, 20%, and 10%, respectively) [14]. States on the vertical axis emit quality scores on the horizontal axis. The sum of emission probabilities on each state of vertical axis is 100%. These are matrices of 'Acc.82'-'Acc.88' (e.g., 'Acc.84' refers to a read group with an accuracy of 83.5%-84.4%). In the matrix of Nanopore, quality scores above 25 are not displayed.

(a) PacBio P6-C4 for *C.elegans*

(b) Nanopore R9.5 for *R.sphaeroides*

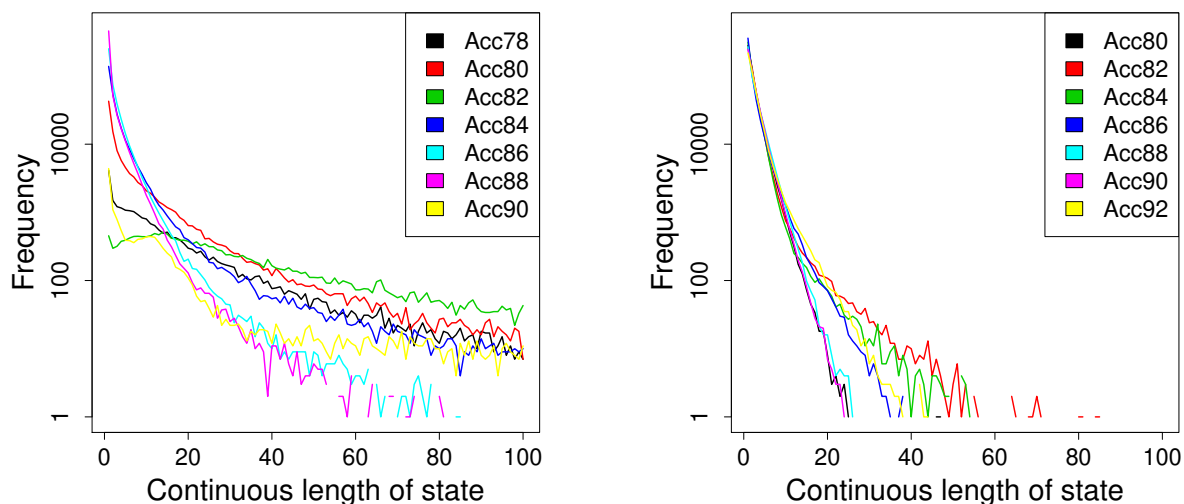

Figure S8: Distributions of continuous length of state. Training data for FIC-HMM was decoded into stats using the Viterbi algorithm. If the same state is lined up five times in a row, the continuous length is five. The vertical axis (log scale) is the frequency of each continuous length of state. The horizontal axis is the continuous length of state. Colors of plotted lines represent the read groups (e.g., 'Acc.78' refers to a read group with an accuracy of 77.5%-78.4%). Continuous lengths of state above 100 are not displayed.

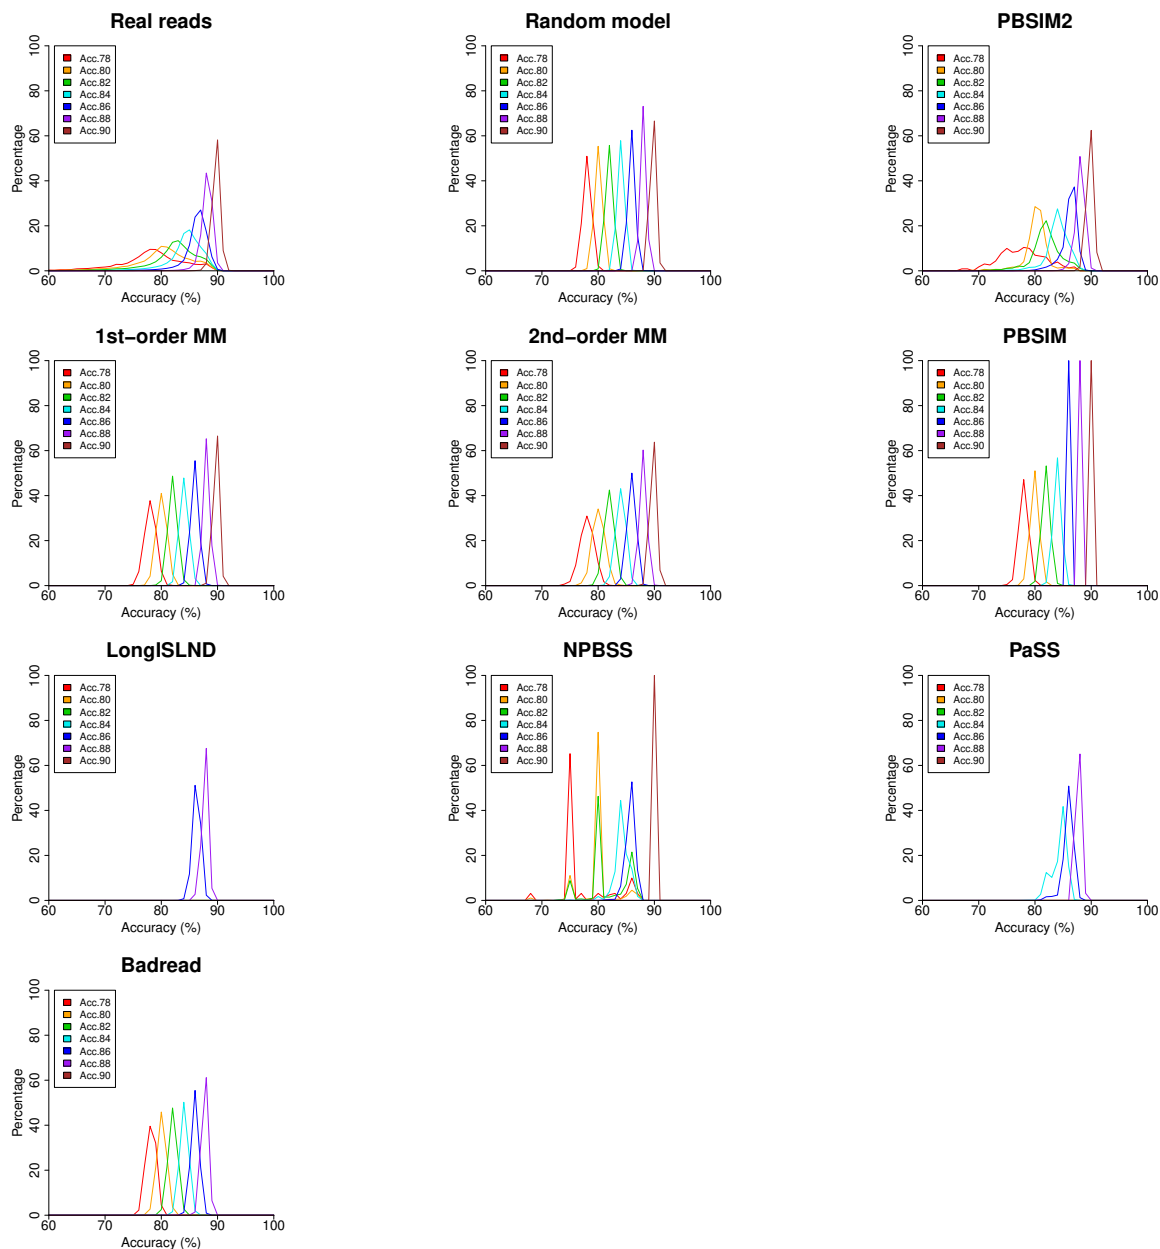

Figure S9: Non-uniformity of quality scores for real and simulated reads of PacBio P6-C4 for *C. elegans*. Each graph shows distributions of accuracy of 800 bp disjoint intervals in reads in the same way as Figure S3. PBSIM (i.e., previous version) has frequency tables of quality score for only Acc.60–85; thus, for Acc.86–90, 800 bp interval accuracy is constant.

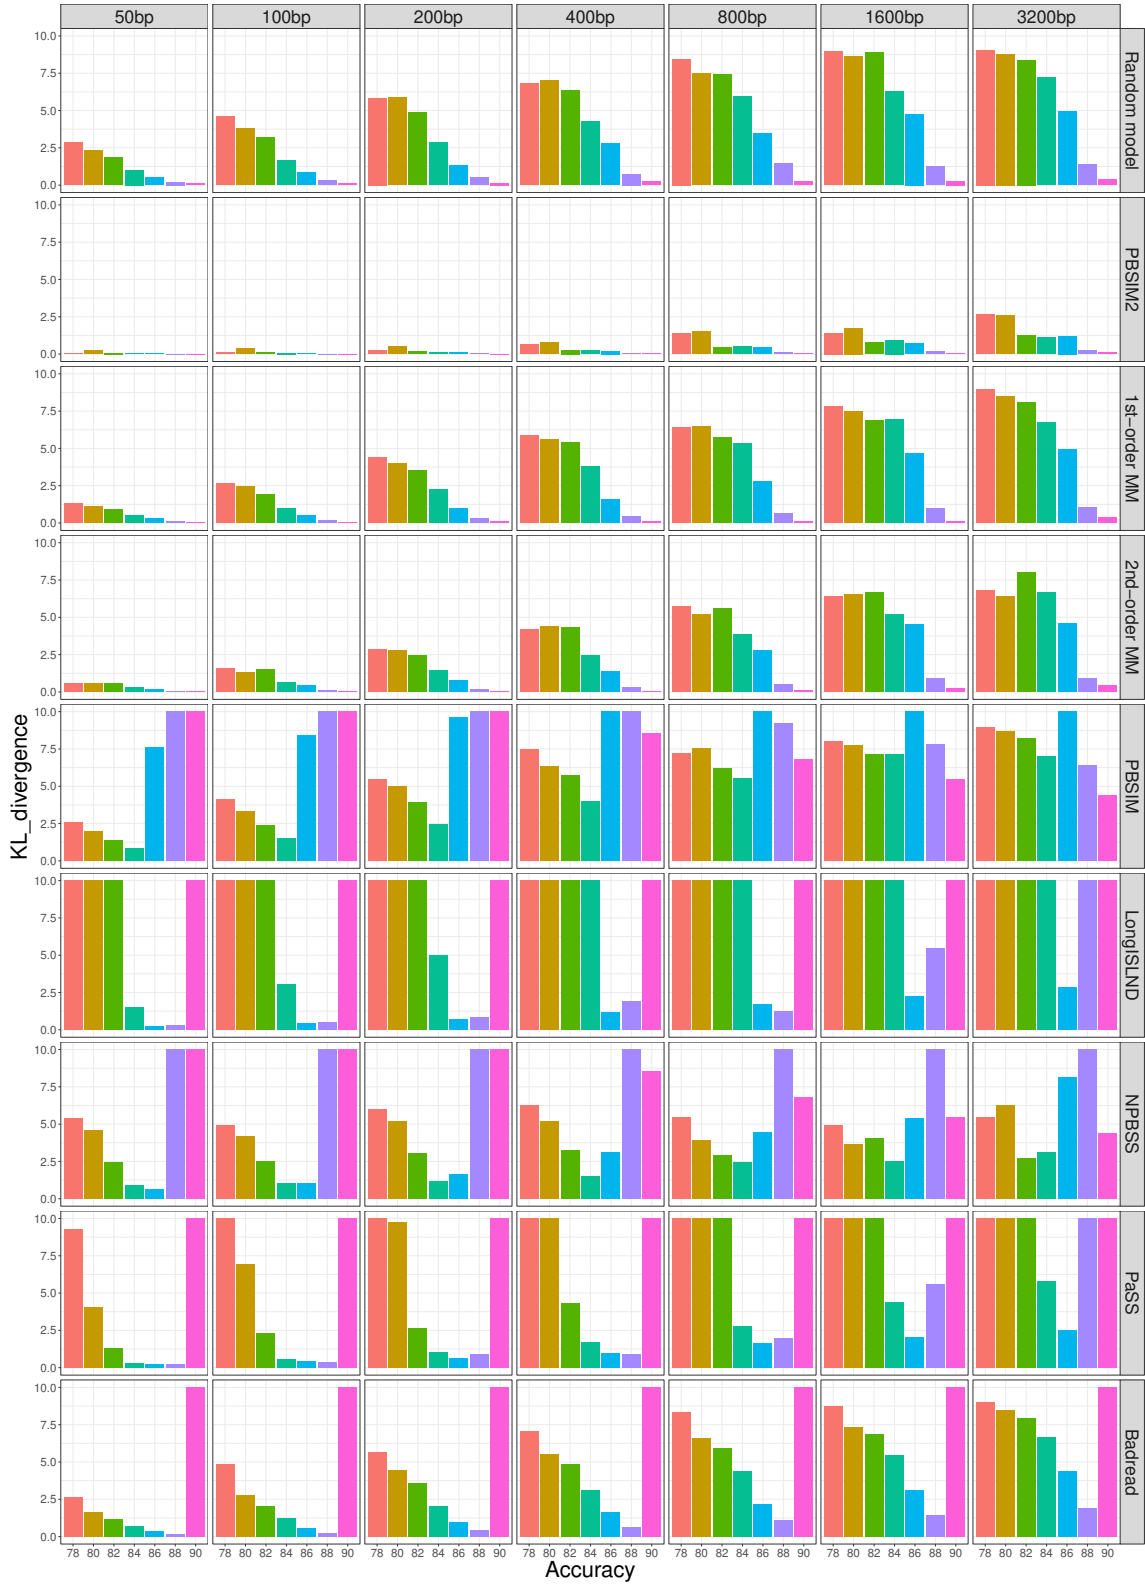

Figure S10: Kullback-Leibler (KL) divergence of distribution of accuracy of fixed size (50, 100, 200, 400, 800, 1600, and 3200 bp) intervals between real and simulated reads of PacBio P6-C4 for *C. elegans* in Figure S9. Upper-limit value of KL divergence is 10.

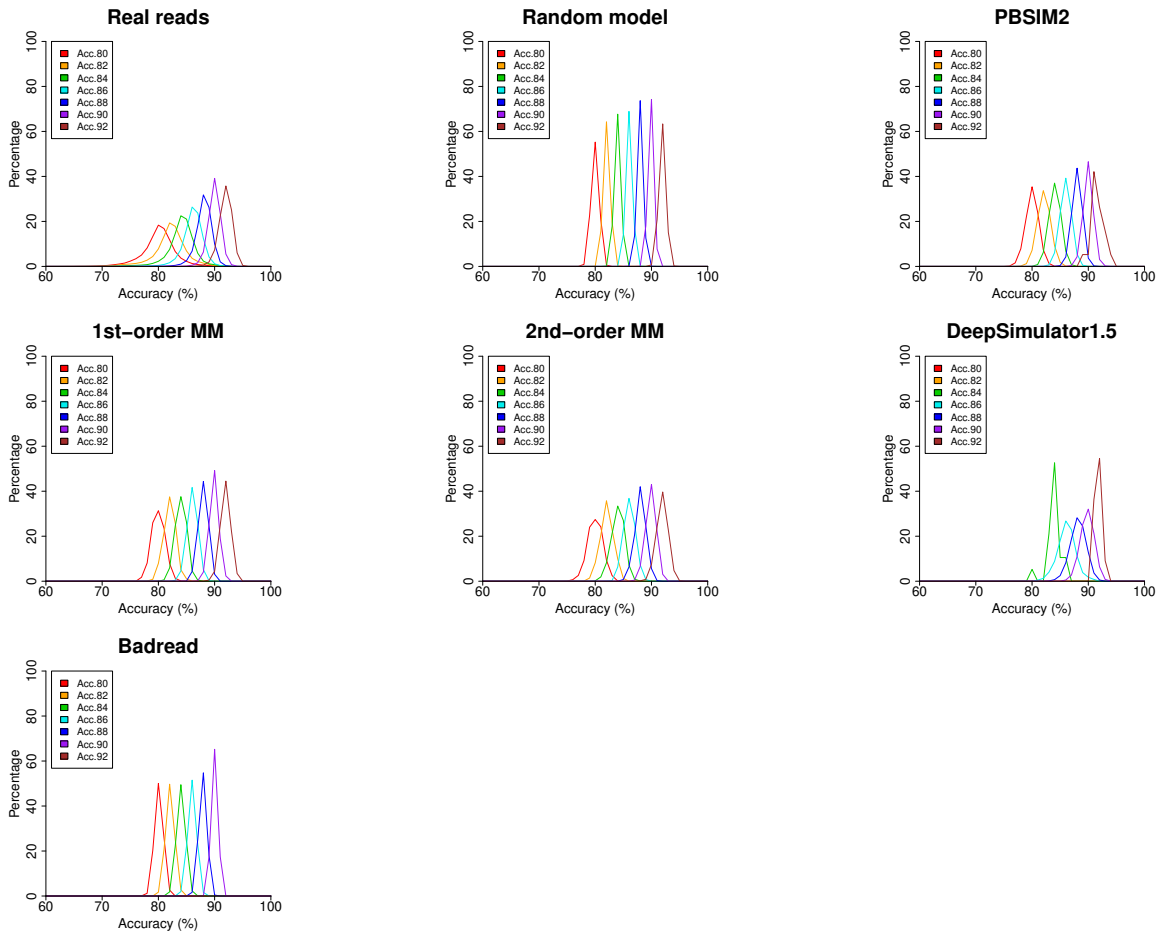

Figure S11: Non-uniformity of quality scores for real and simulated reads of Nanopore R9.5 for *R. sphaeroides*. Each graph shows distributions of accuracy of 800 bp intervals in reads in the same way as Figure S3. Read groups (e.g., Acc.78) with insufficient data are not shown in the graphs.

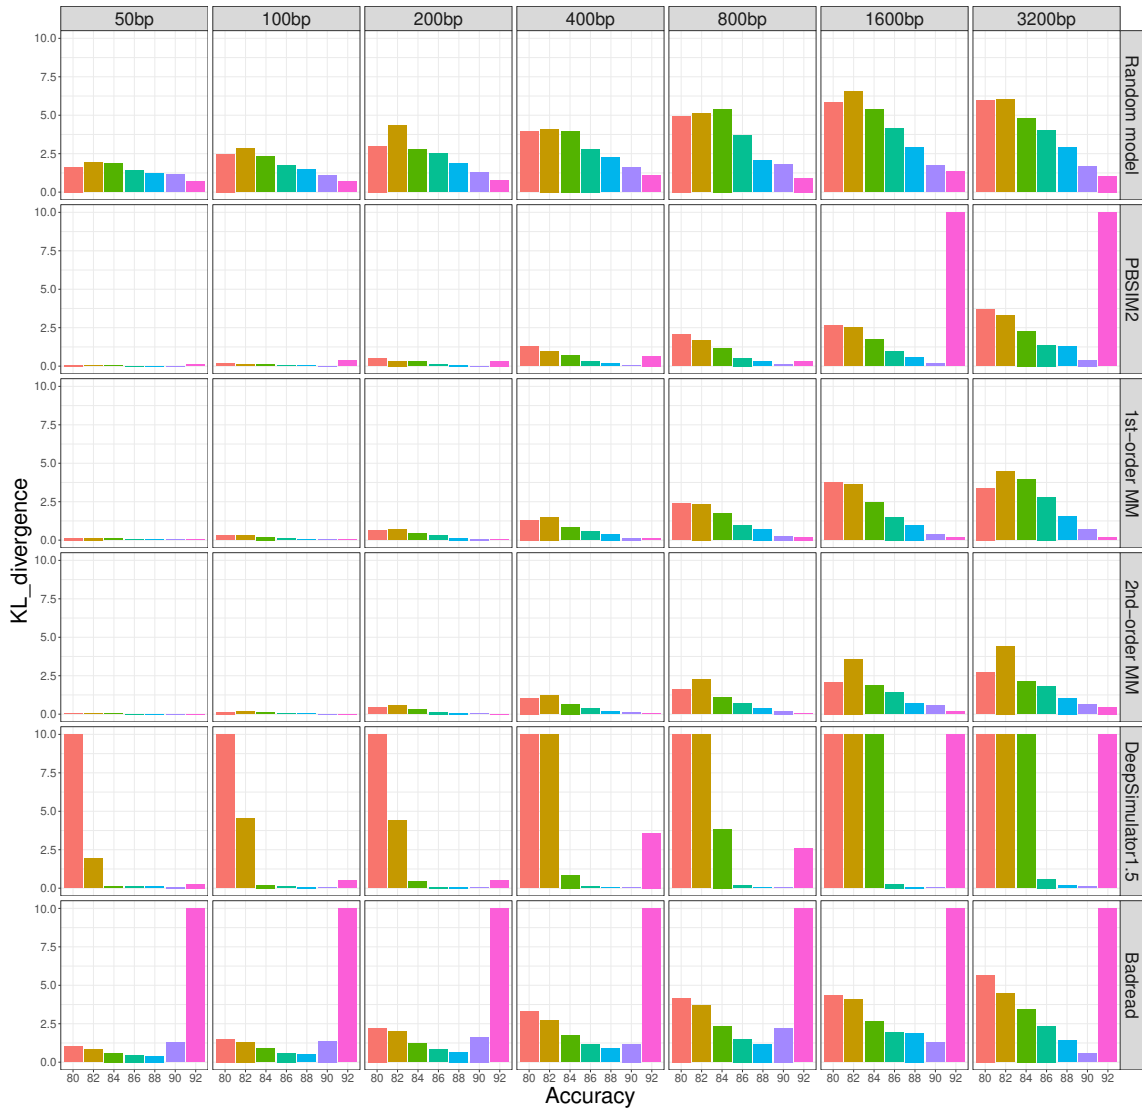

Figure S12: Kullback-Leibler (KL) divergence of distribution of averaged accuracy of fixed size (50, 100, 200, 400, 800, 1600, and 3200 bp) intervals between real and simulated reads of Nanopore R9.5 for *R. sphaeroides* in Figure S11. Upper-limit value of KL divergence is 10.

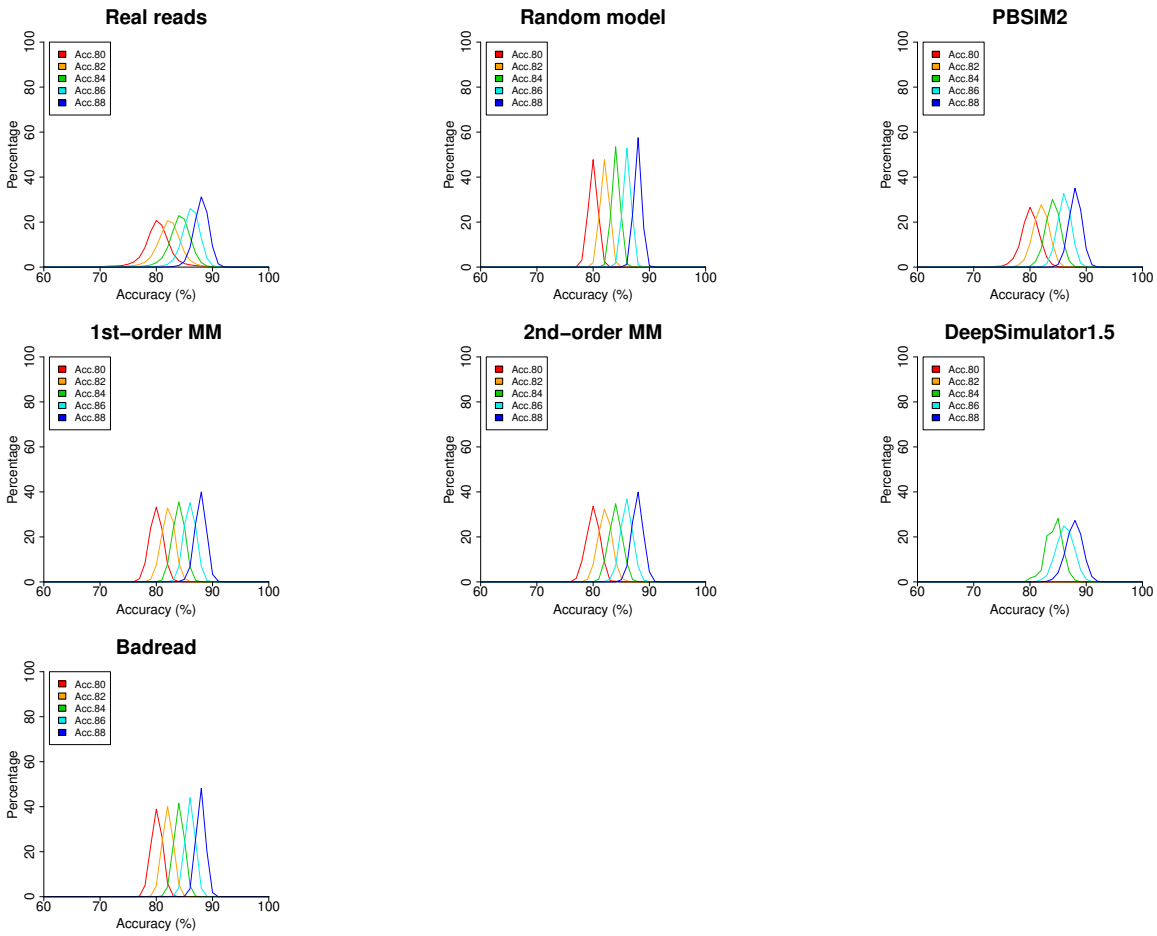

Figure S13: Non-uniformity of quality scores for real and simulated reads of Nanopore R10.3 for *E-coli* K12. Each graph shows distributions of accuracy of 800 bp intervals in read sequences, in the same way as Figure S9.



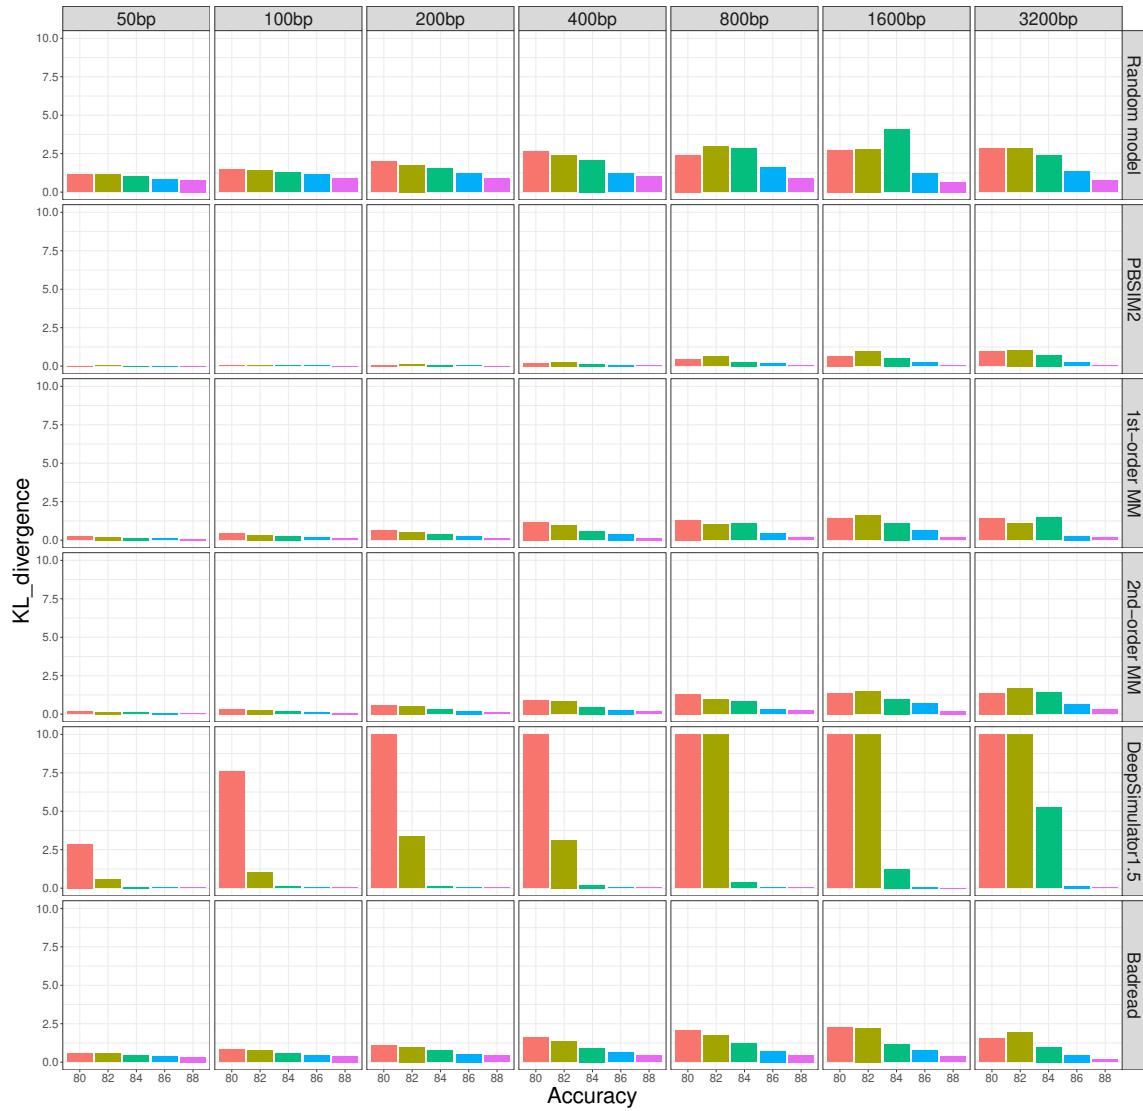

Figure S14: Kullback-Leibler (KL) divergence of distribution of averaged accuracy of fixed size (50, 100, 200, 400, 800, 1600, and 3200 bp) intervals between real and simulated reads of Nanopore R10.3 for *E. coli* K12 in Figure S13. Upper-limit value of KL divergence is 10.

(a) Nanopore R9.5 for *R. sphaeroides*

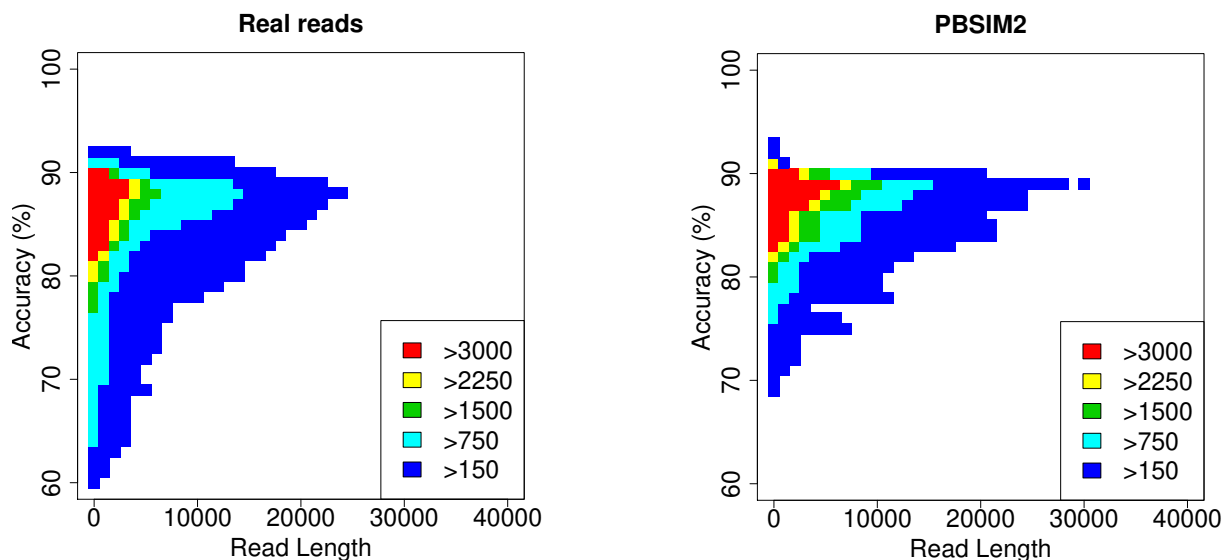

(b) Nanopore R10.3 for *E. coli* K12

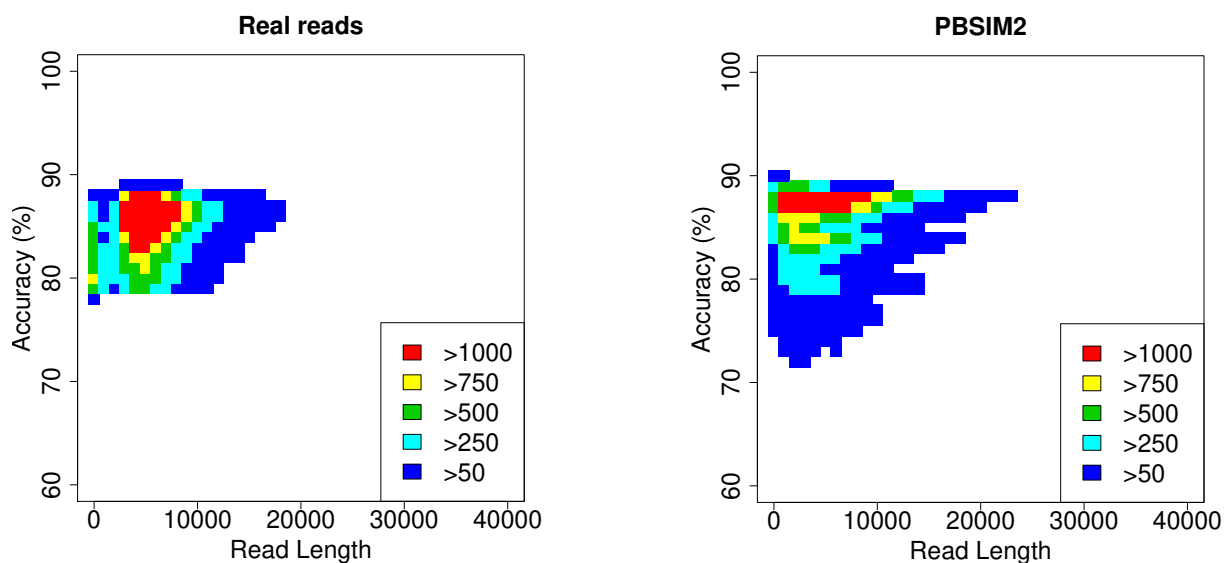

Figure S15: Correlation between read length and accuracy for each read. The accuracy of each read was calculated from the quality scores. PBSIM2 simulated reads with the same parameters (e.g., mean and standard deviation of read length and accuracy) as real reads. Colors indicate the different frequencies of each cell.

(a) PacBio P6-C4 for *C. elegans*

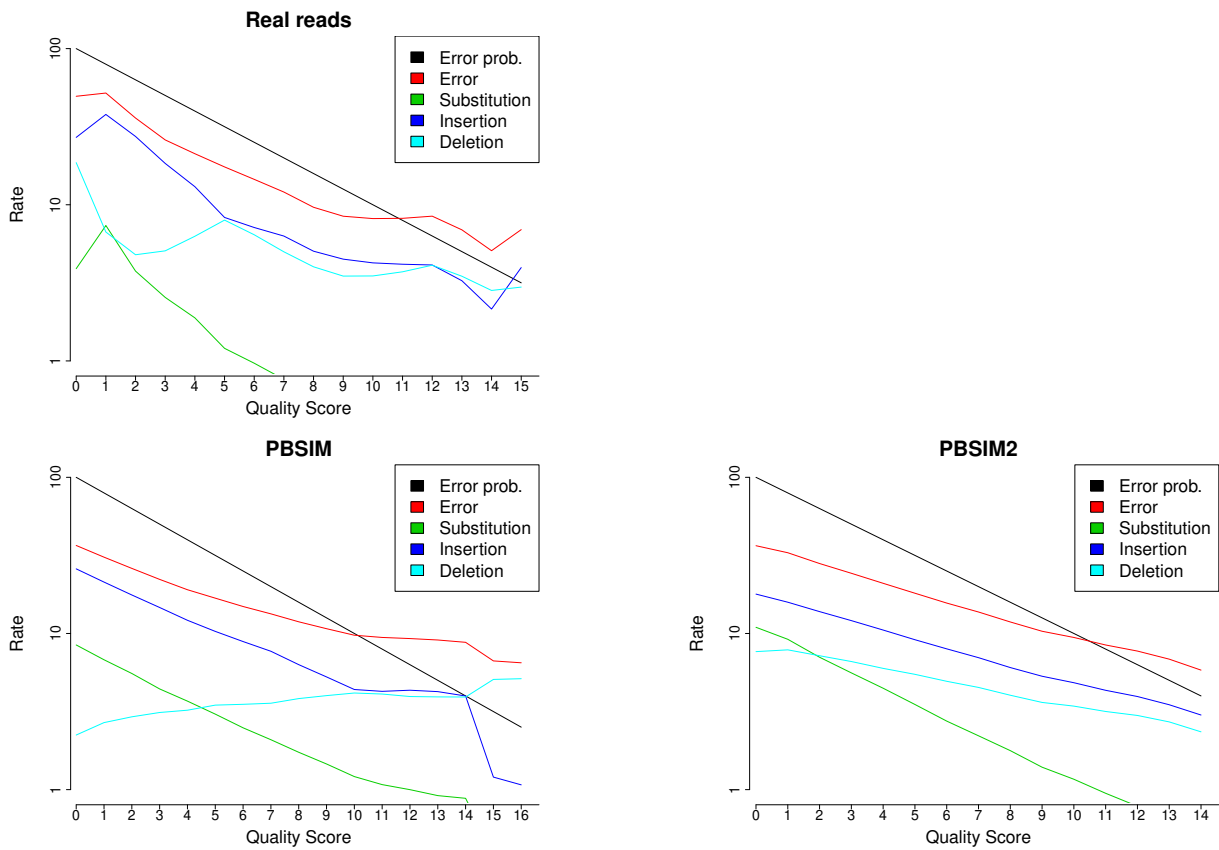

(b) Nanopore R9.5 for *R. sphaeroides*

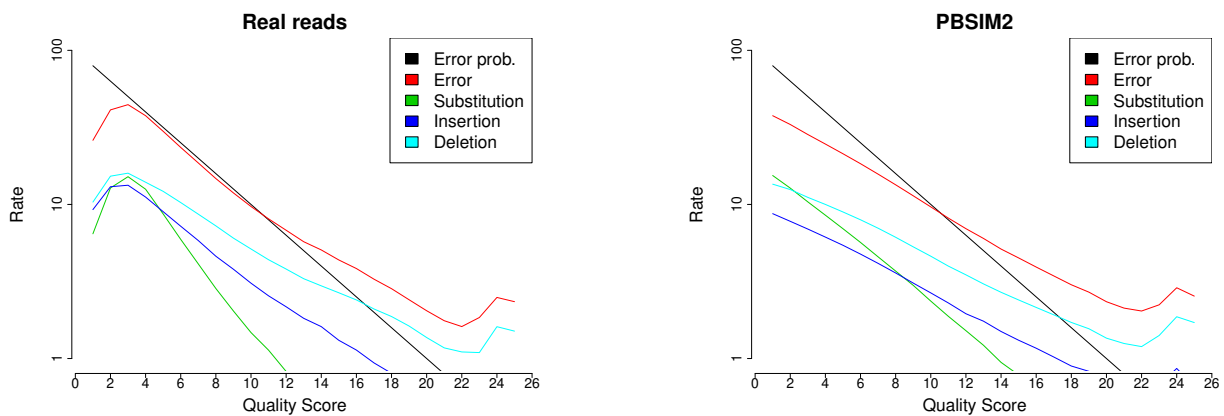

Figure S16: Relationship between the quality score and error rate for real reads and simulated reads. Each graph shows averaged error rate for each quality score. The horizontal axis is PHRED33, quality score defined in terms of the estimated error probability (e.g., quality scores 4, 7, and 10 represent error probabilities of 40%, 20%, and 10%, respectively) [14]. "Error" is the sum of the substitution, insertion, and deletion rates. Error rates were obtained from the alignment of the real and simulated reads to the reference sequences.

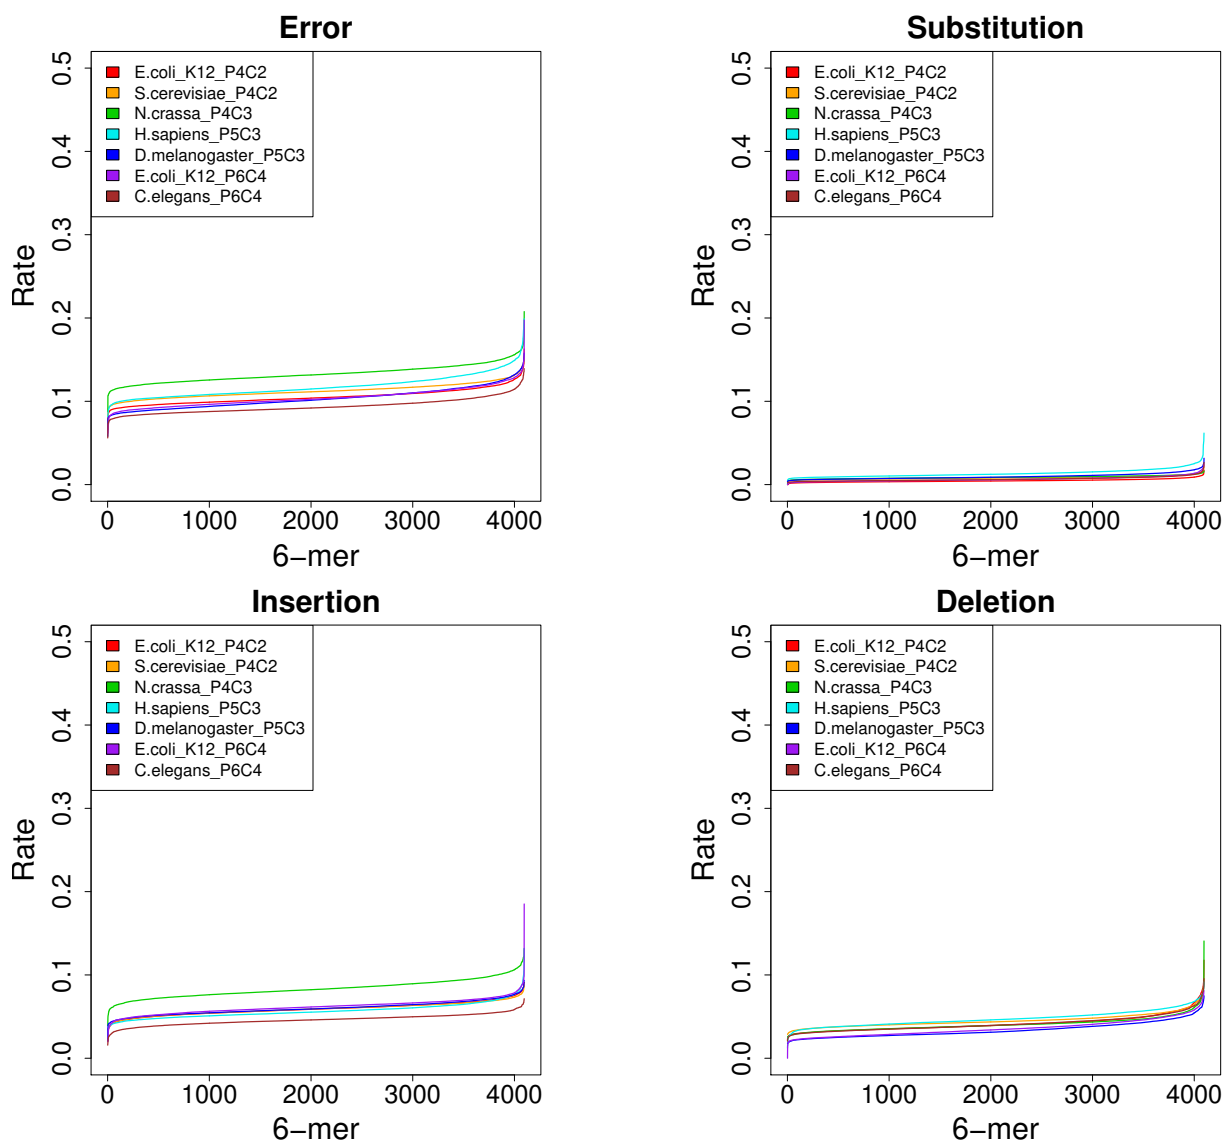

Figure S17: 6-mer error bias of PacBio. Several types of error rate were calculated for each 6-mer from the alignment of the real reads to the reference sequences. Colors of plotted lines represent each dataset in Tables S2. Dataset name is species (e.g., *E.coli\_K12*) + chemistry (e.g., P4C2). The vertical axis represents the error rate, while the horizontal axis represents the k-mer index sorted by error rate. "Error" is the sum of the substitution, insertion, and deletion rates.

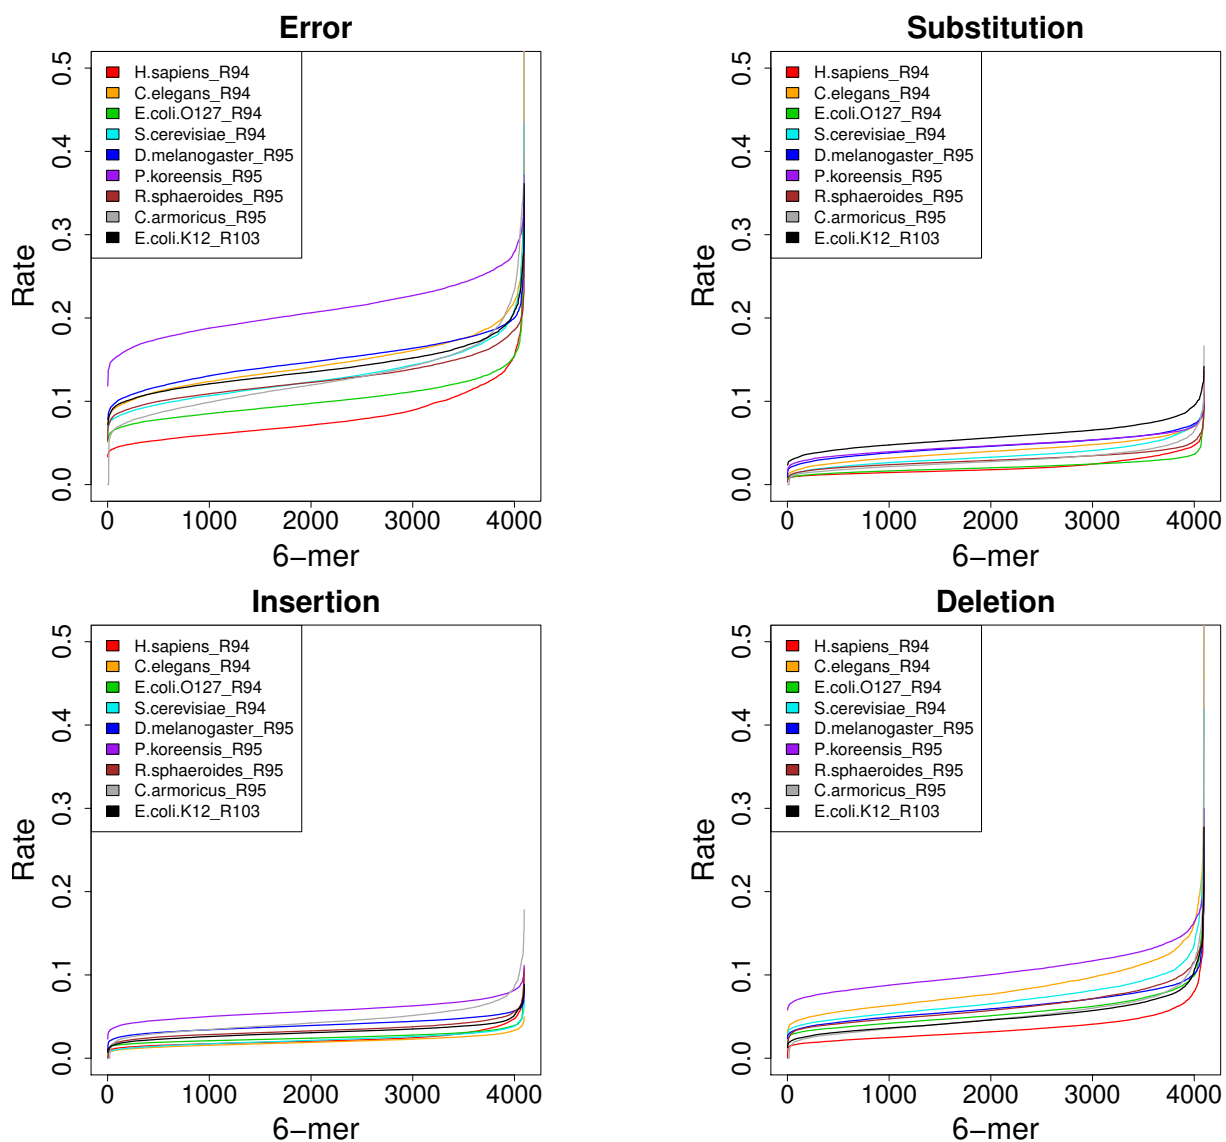

Figure S18: 6-mer error bias of Nanopore. Several types of error rates were calculated for each 6-mer from the alignment of the real reads to the reference sequences. Colors of plotted lines represent each dataset in Tables S3. Dataset name is species (e.g., *H.sapiens*) + chemistry (e.g., R94). The vertical axis represents the error rate, while the horizontal axis represents the k-mer index sorted by error rate. "Error" is the sum of the substitution, insertion, and deletion rates.

(a) PacBio P6-C4 for *C.elegans*

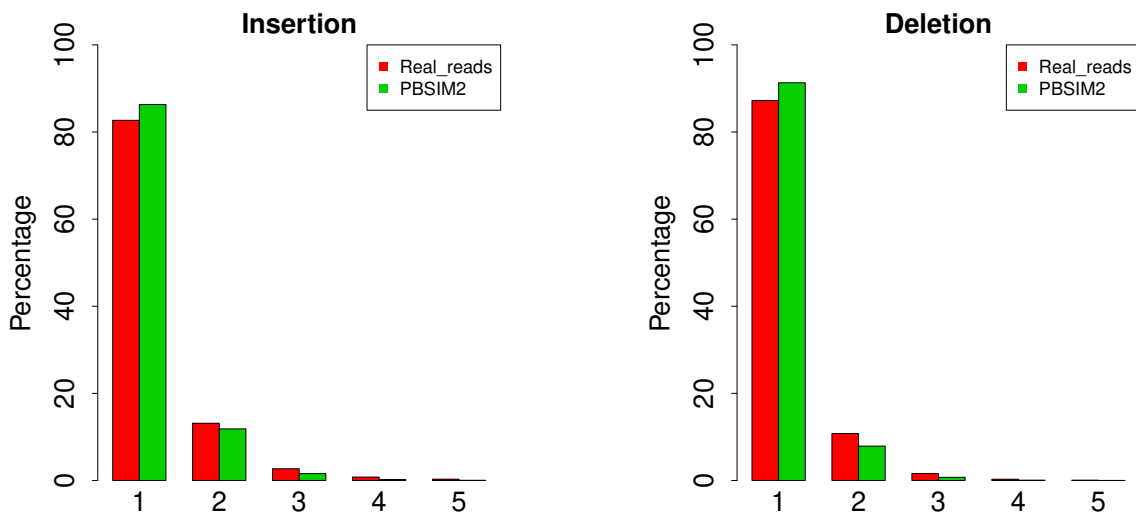

(b) Nanopore R9.5 for *R.sphaeroides*

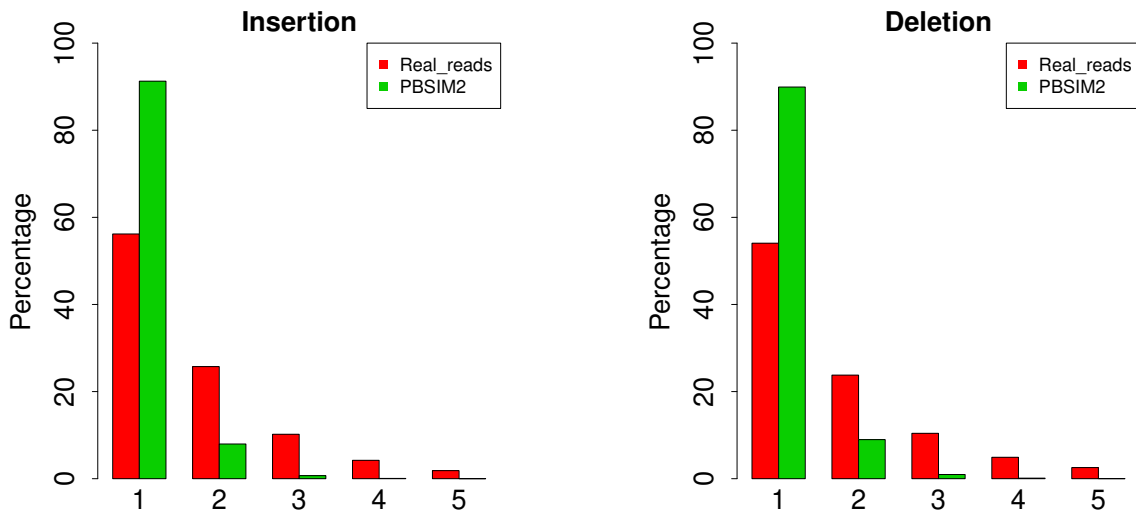

(c) Nanopore R10.3 for *E-coli* K12

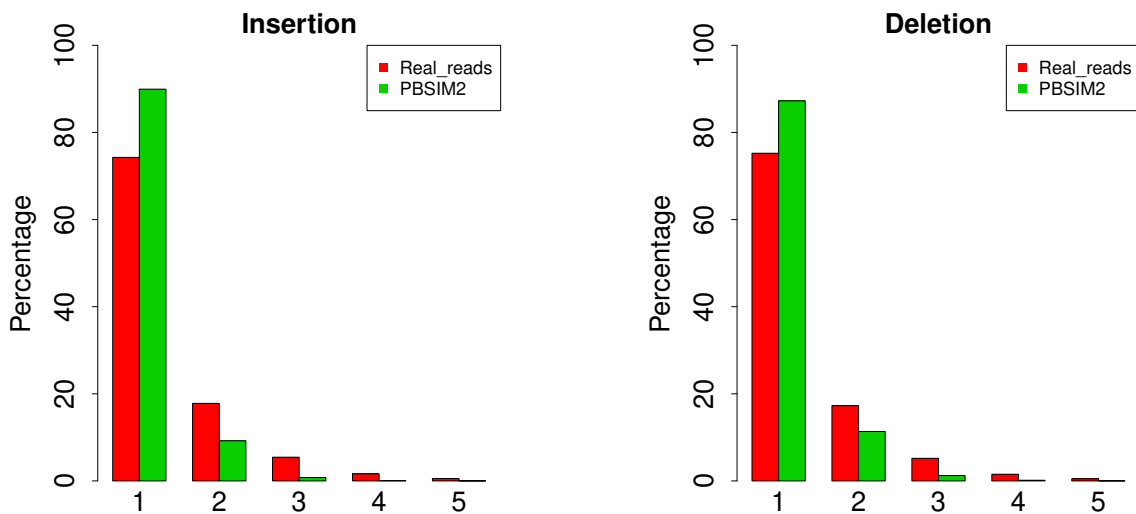

Figure S19: Distributions of insertion and deletion length (indel) for real reads and PBSIM2. The vertical axis represents the percentage, while the horizontal axis represents the indel length. Frequencies of indel length were obtained from the alignment of the real and simulated reads to the reference sequences.

## References

- [1] Yukiteru Ono, Kiyoshi Asai, and Michiaki Hamada. Pbsim: Pacbio reads simulator—toward accurate genome assembly. *Bioinformatics*, 29(1):119–121, 2013.
- [2] Hayan Lee, James Gurtowski, Shinjae Yoo, Shoshana Marcus, W Richard McCombie, and Michael Schatz. Error correction and assembly complexity of single molecule sequencing reads. *BioRxiv*, page 006395, 2014.
- [3] Bianca K Stöcker, Johannes Köster, and Sven Rahmann. Simlord: simulation of long read data. *Bioinformatics*, 32(17):2704–2706, 2016.
- [4] Ethan Alexander Garcia Baker, Sara Goodwin, W Richard McCombie, and Olivia Mendivil Ramos. Silico: a simulator of long read sequencing in pacbio and oxford nanopore. *BioRxiv*, page 076901, 2016.
- [5] Bayo Lau, Marghoob Mohiyuddin, John C Mu, Li Tai Fang, Narges Bani Asadi, Carolina Dallett, and Hugo YK Lam. LongisLnd: in silico sequencing of lengthy and noisy datatypes. *Bioinformatics*, 32(24):3829–3832, 2016.
- [6] Chen Yang, Justin Chu, René L Warren, and Inanç Birol. Nanosim: nanopore sequence read simulator based on statistical characterization. *GigaScience*, 6(4):gix010, 2017.
- [7] Philippe C Faucon, Parithi Balachandran, and Sharon Crook. Snaresim: Synthetic nanopore read simulator. In *2017 IEEE International Conference on Healthcare Informatics (ICHI)*, pages 338–344. IEEE, 2017.
- [8] Ze-Gang Wei and Shao-Wu Zhang. Npbss: a new pacbio sequencing simulator for generating the continuous long reads with an empirical model. *BMC bioinformatics*, 19(1):177, 2018.
- [9] Yu Li, Renmin Han, Chongwei Bi, Mo Li, Sheng Wang, and Xin Gao. Deepsimulator: a deep simulator for nanopore sequencing. *Bioinformatics*, 34(17):2899–2908, 2018.
- [10] Yu Li, Sheng Wang, Chongwei Bi, Zhaowen Qiu, Mo Li, and Xin Gao. Deepsimulator1. 5: a more powerful, quicker and lighter simulator for nanopore sequencing. *Bioinformatics*, 2020.
- [11] Christian Rohrandt, Nadine Kraft, Pay Gießelmann, Björn Brändl, Bernhard M Schuldt, Ulrich Jetzek, and Franz-Josef Müller. Nanopore simulation—a raw data simulator for nanopore sequencing. In *2018 IEEE International Conference on Bioinformatics and Biomedicine (BIBM)*, pages 1–8. IEEE, 2018.
- [12] Wenmin Zhang, Ben Jia, and Chaochun Wei. Pass: a sequencing simulator for pacbio sequencing. *BMC bioinformatics*, 20(1):1–7, 2019.
- [13] Ryan Wick. Badread: simulation of error-prone long reads. *Journal of Open Source Software*, 4(36):1316, 2019.
- [14] Peter JA Cock, Christopher J Fields, Naohisa Goto, Michael L Heuer, and Peter M Rice. The sanger fastq file format for sequences with quality scores, and the solexa/illumina fastq variants. *Nucleic acids research*, 38(6):1767–1771, 2010.
